# Supplementary material for: The Governance of Childhood Vaccination Services in Crisis Settings: A Scoping Review
Source: MDPI journal article supplement (doi:10.3390/vaccines11121853), 2023-12-14
Supplement: s1 [file s1]

**Supplementary material S2**

**Search terms**

| <b>Concept</b>                                                                     | <b>Scientific journal database search<br/>(Terms for title and abstract search)</b>                                                                                                                                                                                                                                                                                                                                                                                                                                                                                                                                                                                                                                                                       | <b>Grey literature search</b>                                     |
|------------------------------------------------------------------------------------|-----------------------------------------------------------------------------------------------------------------------------------------------------------------------------------------------------------------------------------------------------------------------------------------------------------------------------------------------------------------------------------------------------------------------------------------------------------------------------------------------------------------------------------------------------------------------------------------------------------------------------------------------------------------------------------------------------------------------------------------------------------|-------------------------------------------------------------------|
| Countries with a consolidated appeal/humanitarian response plan during 2010 – 2021 | [bangladesh* or colombia* or ("salvador*" or "guanaco*") or guatemala* or hondura* or ("philippine*" or "filipin*") or somali* or ukraine* or "central africa*" or chad or chadian or "south* sudan*" or haiti* or afghan* or niger* or congo* or mali or malian or benin* or gambia* or liberia* or burkina* or yemen* or mozambi* or nigeria* or ("cote d'ivoire*" or "ivory coast*" or "ivorian*") or sudan* or djibouti* or pakistan* or zimbabwe* or burundi* or ("eswatini*" or "swazi*" or "swati*") or uganda* or ethiopia* or kenya* or cameroon* or ("myanma*" or "burm*") or ("palestin*" or "west bank*" or "gaza*") or iraq* or leban* or libya* or syria* or venezuela*]<br><br>A subject heading search was not conducted for this concept | "Low- and middle-income countries", Humanitarian, Crisis, Fragile |
| Vaccination                                                                        | [Vaccin*, immunis*, immuniz*]<br><br>A subject heading search was also conducted for this concept                                                                                                                                                                                                                                                                                                                                                                                                                                                                                                                                                                                                                                                         | Vaccination, immunisation, immunization                           |
| Governance                                                                         | [governi*, governa*, governe* leadership, accountab*, stewardship, decision-making]<br><br>A subject heading search was also conducted for this concept                                                                                                                                                                                                                                                                                                                                                                                                                                                                                                                                                                                                   | Governance, leadership, accountability, decision-making           |
| Service Planning                                                                   | [service*] adj2 [plan*, develop*]<br><br>OR<br><br>[fund*, financ*, spend*, subsid*]<br><br>OR<br><br>[purchas*, procur*]<br><br>A subject heading search was also conducted for this concept                                                                                                                                                                                                                                                                                                                                                                                                                                                                                                                                                             | Service planning, Finance, Procurement                            |
